# Supplementary material for: Food security reduces multiple HIV infection risks for high‐vulnerability adolescent mothers and non‐mothers in South Africa: a cross‐sectional study
Source: PubMed Central journal article supplement (PMC9411725; doi:10.1002/jia2.25928), 2022-08-25
Supplement: JIA2-25-e25928-s004.pdf [file JIA2-25-e25928-s004.pdf]

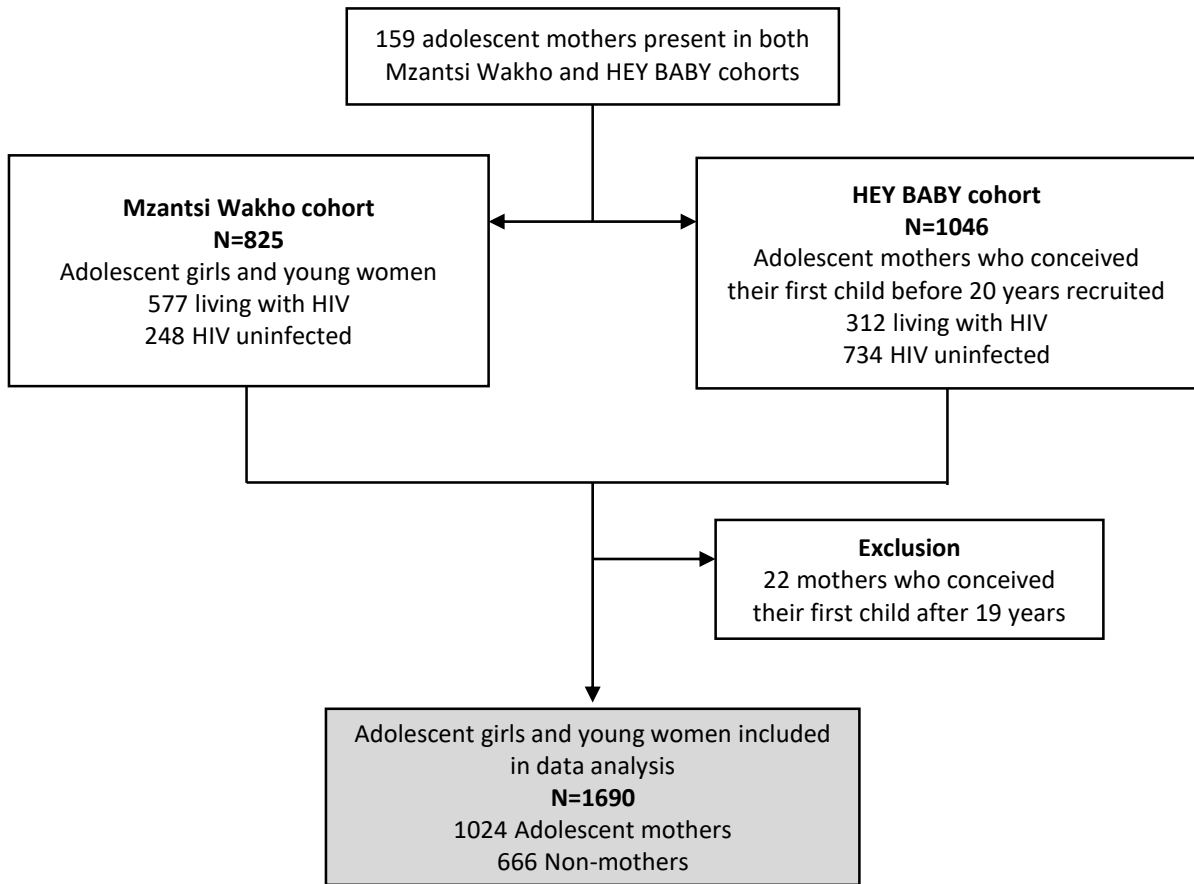

**S1 Figure. Flow chart of participants included in the study.**
